# Supplementary material
Source: Research Square preprint supplement (doi:10.21203/rs.3.rs-10089026/v1)

Appendix I


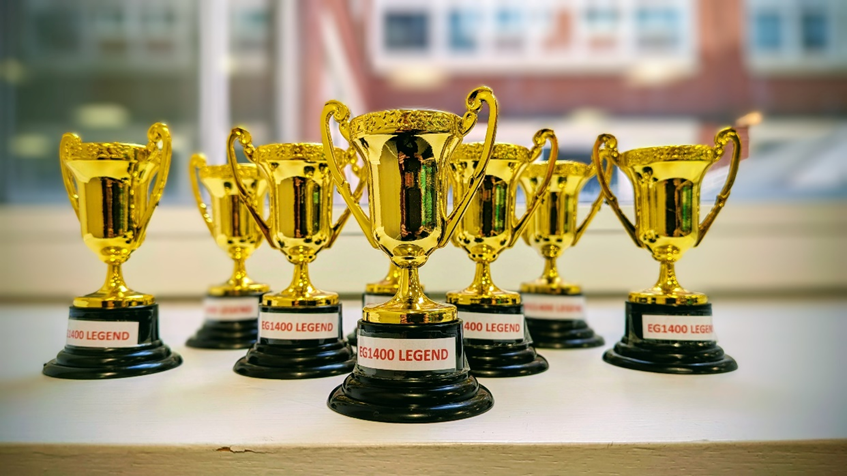


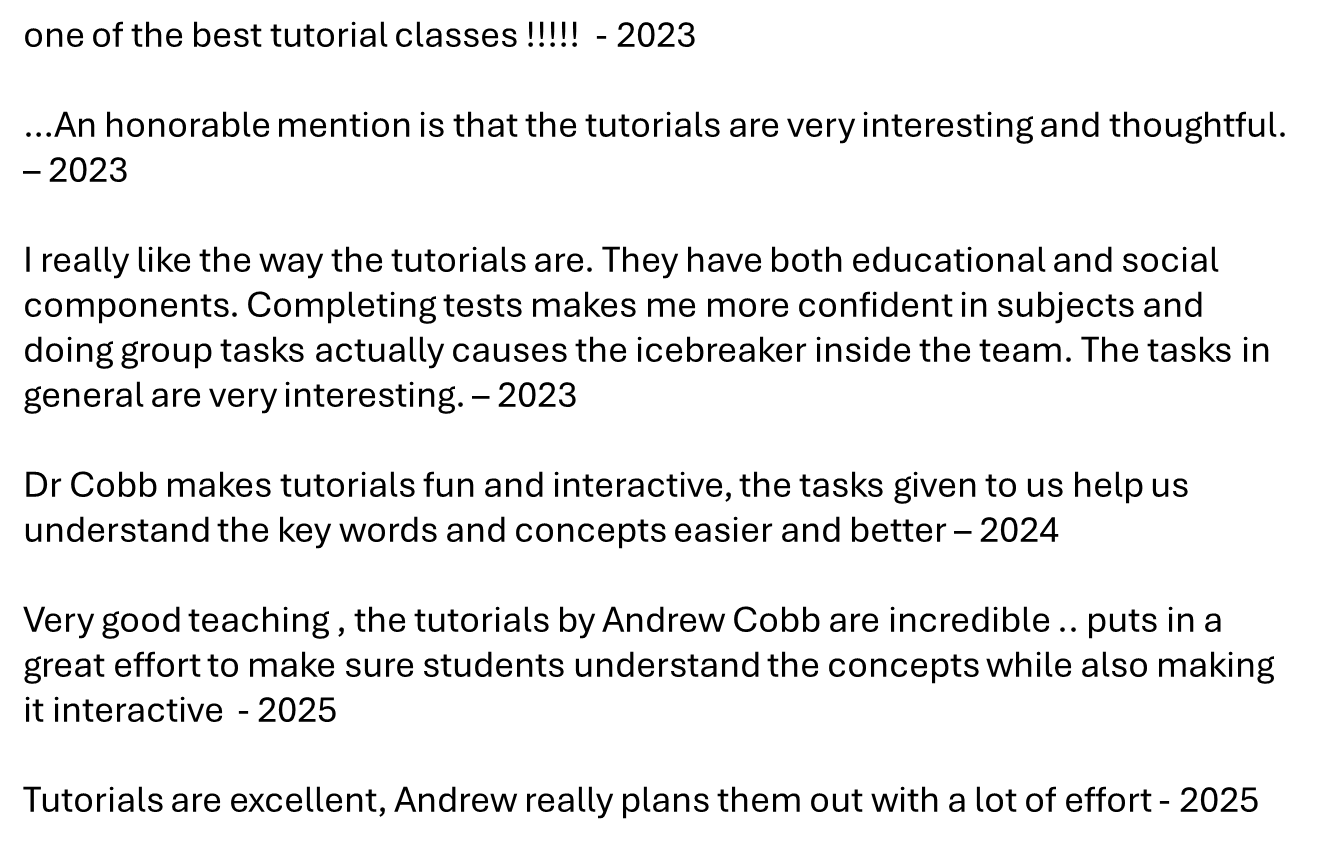
Appendix II

Supplement: Supplementary file 1 [file 3ba8e78dd90be3d5faad0259.docx]
